Frank Heuts, Natalie M. Edner, and Lucy S.K. Walker

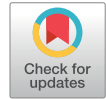

## Follicular T Helper Cells: A New Marker of Type 1 Diabetes Risk?

*Diabetes* 2017;66:258–260 | DOI: 10.2337/dbi16-0062

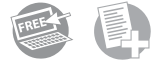

The incidence of type 1 diabetes (T1D) is increasing at an alarming rate, particularly in young children, and a better understanding of the immune response that triggers this condition is urgently required. A consistent immune feature in many individuals is the appearance of autoantibodies against pancreatic islet antigens, and this can precede the onset of diabetes by many years. Monitoring the autoantibody response is of considerable predictive value, with seroconversion to multiple islet autoantibodies incurring a high risk of future T1D development (1), particularly if the autoantibodies are of high affinity (2). Islet autoantibodies are produced by B cells in a manner that generally requires the help of specialized CD4<sup>+</sup> T cells. Exciting recent progress in immunology has generated a new molecular definition of the T cells that provide this help, now called follicular T helper cells (Tfh) (reviewed in ref. 3) (Fig. 1A). Importantly, it has been established that Tfh can give rise to a memory population that circulates in peripheral blood and can be identified on the basis of particular surface markers including CXCR5 (the chemokine receptor that attracts T cells to B-cell follicles), ICOS, and PD-1 (4). This has changed the landscape for immune monitoring in diseases characterized by autoantibody production, and elevations in Tfh have been reported in a number of autoimmune conditions including systemic lupus erythematosus, rheumatoid arthritis, and autoimmune thyroid disease (reviewed in ref. 3). It has recently been shown that T cells with a Tfh phenotype are overrepresented in the peripheral blood of individuals with established T1D (5,6). In this issue of *Diabetes*, Viisanen et al. (7) test whether increases in Tfh cells can be detected early after T1D diagnosis and, crucially, even before the onset of overt disease. The latter is a key question as there is currently a dearth of reliable T-cell biomarkers in the at-risk setting.

Using a strict pairwise comparison with age-matched healthy controls, the authors found that CXCR5<sup>+</sup>PD-1<sup>+</sup>ICOS<sup>+</sup>–activated circulating Tfh cells were significantly elevated

in children who had been diagnosed with T1D within the last 7 days (7). The observation was specific to the CXCR5<sup>+</sup> T-cell compartment, as the frequency of CXCR5<sup>+</sup>PD-1<sup>+</sup>ICOS<sup>+</sup> cells did not differ between the two groups. Remarkably, analysis of autoantibody-positive at-risk children revealed that elevations in activated Tfh could be detected even prior to onset of diabetes (Fig. 1B). Of note, the presence of increased activated Tfh appeared to identify children at the late stages of preclinical T1D, exhibiting multiple autoantibody positivity and impaired glucose tolerance. So are elevations in Tfh numbers linked to progression to overt disease? As a first step to exploring this, the authors performed a limited longitudinal analysis on 11 autoantibody-positive at-risk children, 6 of whom progressed to diabetes during the study period. In 4 out of the 6 progressors, the frequency of activated Tfh increased around the time of clinical manifestation of T1D. In contrast, the 5 nonprogressors maintained relatively stable frequencies of Tfh over time. While clearly the small group size precludes firm conclusions, these data provide a strong imperative for future exploration of circulating Tfh in individuals at risk for diabetes development.

Alterations in peripheral blood B-cell subsets were not observed in the current study, in either the newly diagnosed or autoantibody-positive at-risk children (7). This is consistent with another recent report (8) and fits with the notion that germinal center B cells, the key recipients of Tfh help, are not found in peripheral blood. Interestingly, it has previously been shown that IL-21, the signature cytokine made by Tfh, is overproduced in people with T1D (reviewed in ref. 9). In addition to acting on B cells (10), IL-21 can impair immune regulation (11,12), potentially promoting autoimmune outcomes. Indeed, the authors observed a tendency toward a higher frequency of IL-21–producing cells within the CXCR5<sup>+</sup> T cells in children with T1D, although this did not reach statistical significance.

Institute of Immunity and Transplantation, Division of Infection and Immunity, University College London, London, U.K.

Corresponding author: Lucy S.K. Walker, lucy.walker@ucl.ac.uk.

© 2017 by the American Diabetes Association. Readers may use this article as long as the work is properly cited, the use is educational and not for profit, and the work is not altered. More information is available at <http://www.diabetesjournals.org/content/license>.

See accompanying article, p. 437.

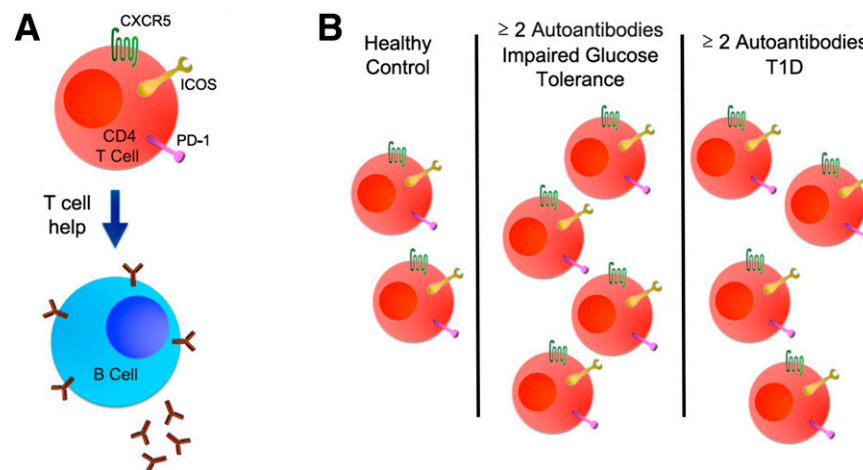

**Figure 1**—CD4 T cells act as gatekeepers to the autoantibody response. **A:** In order to produce high-affinity antibodies, B cells require help from CD4<sup>+</sup> T cells with a CXCR5<sup>+</sup>PD-1<sup>+</sup>ICOS<sup>+</sup> phenotype (Tfh). **B:** The proportion of activated circulating Tfh cells is increased in individuals at risk for developing T1D who have two or more autoantibodies and impaired glucose tolerance (center) as well as in individuals with T1D (right).

The work by Viisanen et al. (7) is timely given our emerging understanding of T-cell–B-cell interactions in the setting of T1D. Recent work has revealed that diabetes is associated with loss of anergy in insulin-binding B cells (13), and skewing B-cell specificity toward islet antigens can promote diabetes in mouse models (14,15). Although it is not believed that B cells or autoantibodies directly trigger  $\beta$ -cell destruction, recent evidence suggests that a high relative frequency of B cells within inflamed islets is associated with more aggressive and earlier onset T1D (16). In light of the findings by Viisanen et al. (7) and others (5,6), it is tempting to speculate that Tfh cells might contribute to aggressive islet lesions because they produce CXCL13 (17), which is a B cell-attracting factor, as well as IL-21, which can promote expansion of CD8 T cells. Tfh and B cells exhibit a highly symbiotic relationship, with Tfh promoting B-cell homeostasis and B cells in turn being required for the full differentiation and/or maintenance of Tfh (17). In this regard it is interesting that depletion of B cells in patients with newly diagnosed T1D appears to reduce Tfh cell numbers (18) while partially preserving  $\beta$ -cell function (19).

The present demonstration that elevations in activated Tfh can be detected prior to T1D onset represents an important advance as it excludes the possibility that the phenomenon is due to insulin therapy or emerges late as a secondary consequence of disease. Instead it supports the idea that Tfh may play a role in T1D pathogenesis. Stratifying patients with T1D on the basis of immune parameters (20) may be useful in selecting immunotherapies that are most likely to be beneficial. In this regard, targeting Tfh products (such as IL-21) and B cells may be particularly appropriate in individuals with multiple autoantibody positivity and elevated numbers of activated Tfh. If borne out by larger studies,

Tfh analysis could conceivably feed into multiparameter algorithms for predicting onset of disease in individuals at risk for T1D development (21).

**Funding.** The work of the authors is supported by Diabetes UK, The Rosetrees Trust, the Diabetes Research and Wellness Foundation, and the Medical Research Council. The authors have received funding from the European Union's Horizon 2020 research and innovation program under the Marie Skłodowska-Curie grant agreement no. 675395.

**Duality of Interest.** No potential conflicts of interest relevant to this article were reported.

## References

1. Ziegler AG, Rewers M, Simell O, et al. Seroconversion to multiple islet autoantibodies and risk of progression to diabetes in children. *JAMA* 2013;309:2473–2479
2. Achenbach P, Koczwara K, Knopff A, Naserke H, Ziegler AG, Bonifacio E. Mature high-affinity immune responses to (pro)insulin anticipate the autoimmune cascade that leads to type 1 diabetes. *J Clin Invest* 2004;114:589–597
3. Tangye SG, Ma CS, Brink R, Deenick EK. The good, the bad and the ugly - TFH cells in human health and disease. *Nat Rev Immunol* 2013;13:412–426
4. Schmitt N, Bentebibel SE, Ueno H. Phenotype and functions of memory Tfh cells in human blood. *Trends Immunol* 2014;35:436–442
5. Kenefeck R, Wang CJ, Kapadi T, et al. Follicular helper T cell signature in type 1 diabetes. *J Clin Invest* 2015;125:292–303
6. Ferreira RC, Simons HZ, Thompson WS, et al. IL-21 production by CD4<sup>+</sup> effector T cells and frequency of circulating follicular helper T cells are increased in type 1 diabetes patients. *Diabetologia* 2015;58:781–790
7. Viisanen T, Ihantola E-L, Nantö-Salonen K, et al. Circulating CXCR5<sup>+</sup>PD-1<sup>+</sup>ICOS<sup>+</sup> follicular T helper cells are increased close to the diagnosis of type 1 diabetes in children with multiple autoantibodies. *Diabetes* 2017;66:437–447
8. Thompson WS, Pekalski ML, Simons HZ, et al. Multi-parametric flow cytometric and genetic investigation of the peripheral B cell compartment in human type 1 diabetes. *Clin Exp Immunol* 2014;177:571–585
9. Walker LS, von Herrath M. CD4 T cell differentiation in type 1 diabetes. *Clin Exp Immunol* 2016;183:16–29
10. Linterman MA, Beaton L, Yu D, et al. IL-21 acts directly on B cells to regulate Bcl-6 expression and germinal center responses. *J Exp Med* 2010;207:353–363

11. Clough LE, Wang CJ, Schmidt EM, et al. Release from regulatory T cell-mediated suppression during the onset of tissue-specific autoimmunity is associated with elevated IL-21. *J Immunol* 2008;180:5393–5401
12. Attridge K, Wang CJ, Wardzinski L, et al. IL-21 inhibits T cell IL-2 production and impairs Treg homeostasis. *Blood* 2012;119:4656–4664
13. Smith MJ, Packard TA, O'Neill SK, et al. Loss of anergic B cells in pre-diabetic and new-onset type 1 diabetic patients. *Diabetes* 2015;64:1703–1712
14. Leeth CM, Racine J, Chapman HD, et al. B-lymphocytes expressing an Ig specificity recognizing the pancreatic  $\beta$ -cell autoantigen peripherin are potent contributors to type 1 diabetes development in NOD mice. *Diabetes* 2016;65:1977–1987
15. Hulbert C, Riseili B, Rojas M, Thomas JW. B cell specificity contributes to the outcome of diabetes in nonobese diabetic mice. *J Immunol* 2001;167:5535–5538
16. Leete P, Willcox A, Krogvold L, et al. Differential insulinitic profiles determine the extent of  $\beta$ -cell destruction and the age at onset of type 1 diabetes. *Diabetes* 2016;65:1362–1369
17. Crotty S. T follicular helper cell differentiation, function, and roles in disease. *Immunity* 2014;41:529–542
18. Xu X, Shi Y, Cai Y, et al. Inhibition of increased circulating Tfh cell by anti-CD20 monoclonal antibody in patients with type 1 diabetes. *PLoS One* 2013;8:e79858
19. Pescovitz MD, Greenbaum CJ, Krause-Steinrauf H, et al.; Type 1 Diabetes TrialNet Anti-CD20 Study Group. Rituximab, B-lymphocyte depletion, and preservation of beta-cell function. *N Engl J Med* 2009;361:2143–2152
20. Arif S, Leete P, Nguyen V, et al. Blood and islet phenotypes indicate immunological heterogeneity in type 1 diabetes. *Diabetes* 2014;63:3835–3845
21. Bonifacio E. Predicting type 1 diabetes using biomarkers. *Diabetes Care* 2015;38:989–996
